# Supplementary material for: Comparison of the Prognostic Value of Platelet-Related Indices in Biliary Tract Cancer Undergoing Surgical Resection
Source: PubMed Central journal article supplement — Cancer Res Treat. 2020 Nov 23;53(2):528–40. doi: 10.4143/crt.2020.833 (PMC8053856; doi:10.4143/crt.2020.833), 2020-11-23
Supplement: crt-2020-833_S1Fig.pdf [file crt-2020-833_S1Fig.pdf]

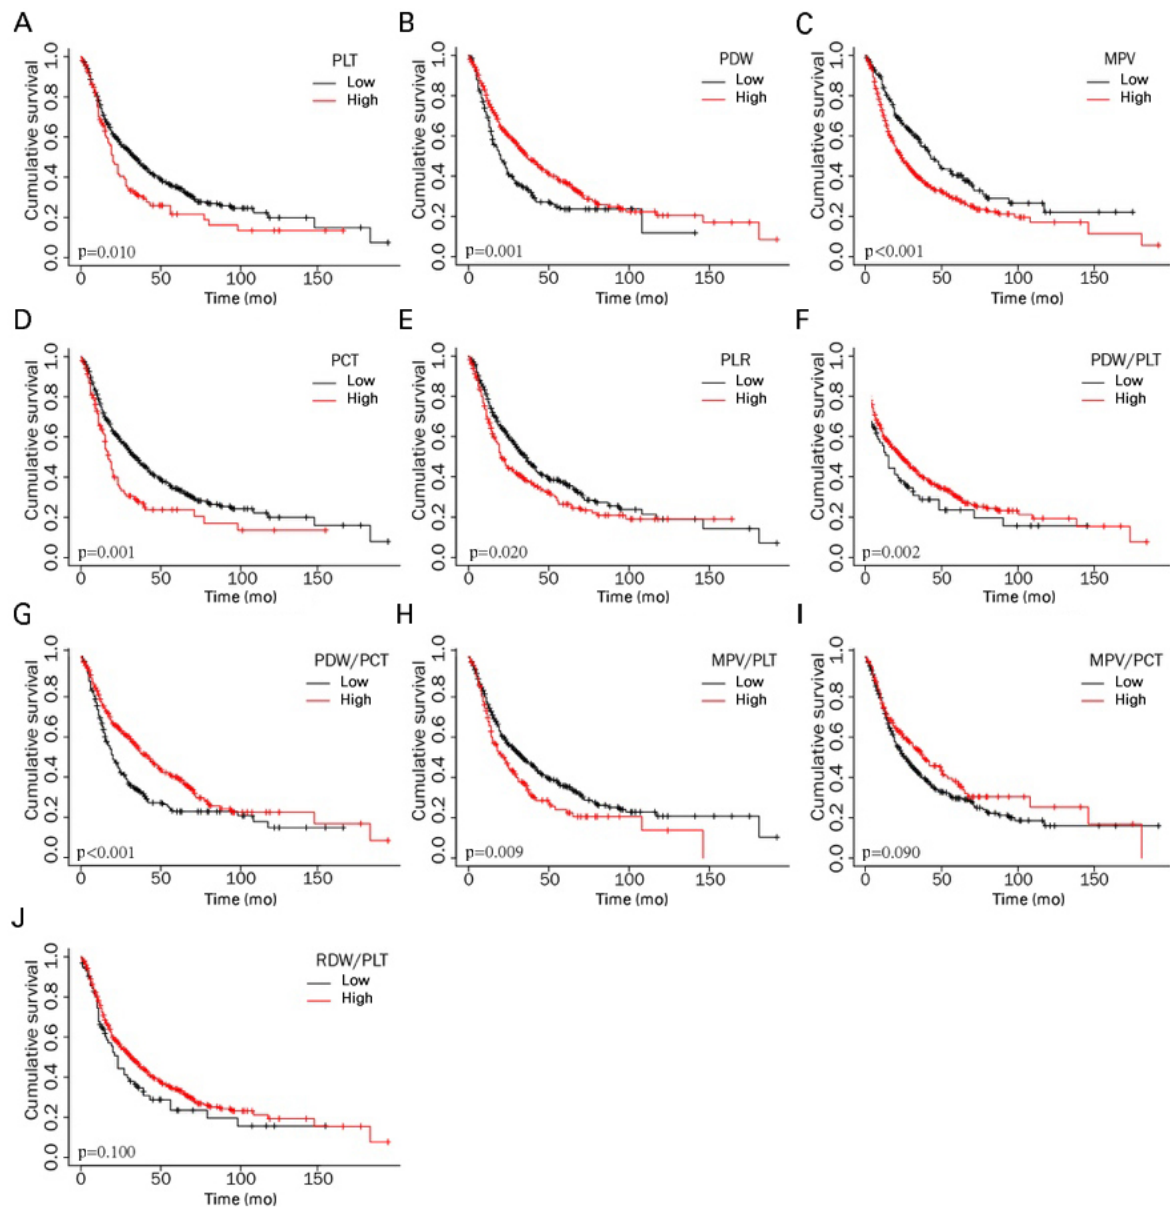

**S1 Fig.** Kaplan-Meier curves of platelet indices for OS prediction. Overall survival of patients with BTC classified by PLT (A), PDW (B), MPV (C), PCT (D), PLR (E), PDW/PLT (F), PDW/PCT (G), MPV/PLT (H), MPV/PCT (I), and RDW/PLT (J). BTC, biliary tract cancer; MPV, mean platelet volume; OS, overall survival; PCT, plateletocrit; PDW, platelet distribution width; PLR, platelet-to-lymphocyte ratio; PLT, platelet count; RDW, red blood cell distribution width.
