# Supplementary material for: Comparison of the Prognostic Value of Platelet-Related Indices in Biliary Tract Cancer Undergoing Surgical Resection
Source: PubMed Central journal article supplement — Cancer Res Treat. 2020 Nov 23;53(2):528–40. doi: 10.4143/crt.2020.833 (PMC8053856; doi:10.4143/crt.2020.833), 2020-11-23
Supplement: crt-2020-833_S4Table.pdf [file crt-2020-833_S4Table.pdf]

**S4 Table.** Correlations between MPV, PDW/PCT, and operation outcomes

| Level                | PDW/PCT       |               | p-value  | MPV (fl)      |               | p-value  |
|----------------------|---------------|---------------|----------|---------------|---------------|----------|
|                      | ≤ 190         | > 190         |          | ≤ 8.1         | > 8.1         |          |
| No.                  | 232           | 276           |          | 166           | 349           |          |
| Hospital stay (day)  | 23 (18-35)    | 20 (15-28)    | < 0.001* | 19 (15-27)    | 22 (17-33)    | < 0.001* |
| Operation bleed (mL) | 400 (200-600) | 400 (200-600) | 0.299    | 300 (200-500) | 400 (200-600) | 0.245    |
| Biliary leakage      |               |               |          |               |               |          |
| No                   | 225 (98.7)    | 265 (97.4)    | 0.358    | 163 (100)     | 334 (97.1)    | 0.035*   |
| Yes                  | 3 (1.3)       | 7 (2.6)       |          | 0             | 10 (2.9)      |          |
| Infection            |               |               |          |               |               |          |
| No                   | 183 (80.3)    | 211 (77.6)    | 0.533    | 133 (81.6)    | 268 (77.9)    | 0.403    |
| Yes                  | 45 (19.7)     | 61 (22.4)     |          | 30 (18.4)     | 76 (22.1)     |          |
| Ascites              |               |               |          |               |               |          |
| No                   | 209 (91.7)    | 235 (86.4)    | 0.086    | 142 (87.1)    | 309 (89.8)    | 0.449    |
| Yes                  | 19 (8.3)      | 37 (13.6)     |          | 21 (12.9)     | 35 (10.2)     |          |
| Liver failure        |               |               |          |               |               |          |
| No                   | 223 (97.8)    | 267 (98.2)    | 1.000    | 162 (99.4)    | 335 (97.4)    | 0.179    |
| Yes                  | 5 (2.2)       | 5 (1.8)       |          | 1 (0.6)       | 9 (2.6)       |          |
| Postoperation bleed  |               |               |          |               |               |          |
| No                   | 218 (95.6)    | 266 (97.8)    | 0.205    | 161 (98.8)    | 330 (95.9)    | 0.106    |
| Yes                  | 10 (4.4)      | 6 (2.2)       |          | 2 (1.2)       | 14 (4.1)      |          |

|                    |            |            |       |            |            |       |
|--------------------|------------|------------|-------|------------|------------|-------|
| Other complication |            |            |       |            |            |       |
| No                 | 189 (82.9) | 223 (82.0) | 0.882 | 140 (85.9) | 279 (81.1) | 0.229 |
| Yes                | 39 (17.1)  | 49 (18.0)  |       | 23 (14.1)  | 65 (18.9)  |       |
| Total complication |            |            |       |            |            |       |
| No                 | 147 (64.5) | 161 (59.2) | 0.264 | 108 (66.3) | 207 (60.2) | 0.222 |
| Yes                | 81 (35.5)  | 111 (40.8) |       | 55 (33.7)  | 137 (39.8) |       |

---

PCT, plateletcrit; PDW, platelet distribution width; MPV, mean platelet volume. \*Statistically significant ( $p < 0.05$ ).
