# Supplementary material for: Comparison of the Prognostic Value of Platelet-Related Indices in Biliary Tract Cancer Undergoing Surgical Resection
Source: PubMed Central journal article supplement — Cancer Res Treat. 2020 Nov 23;53(2):528–40. doi: 10.4143/crt.2020.833 (PMC8053856; doi:10.4143/crt.2020.833), 2020-11-23
Supplement: crt-2020-833_S5Fig.pdf [file crt-2020-833_S5Fig.pdf]

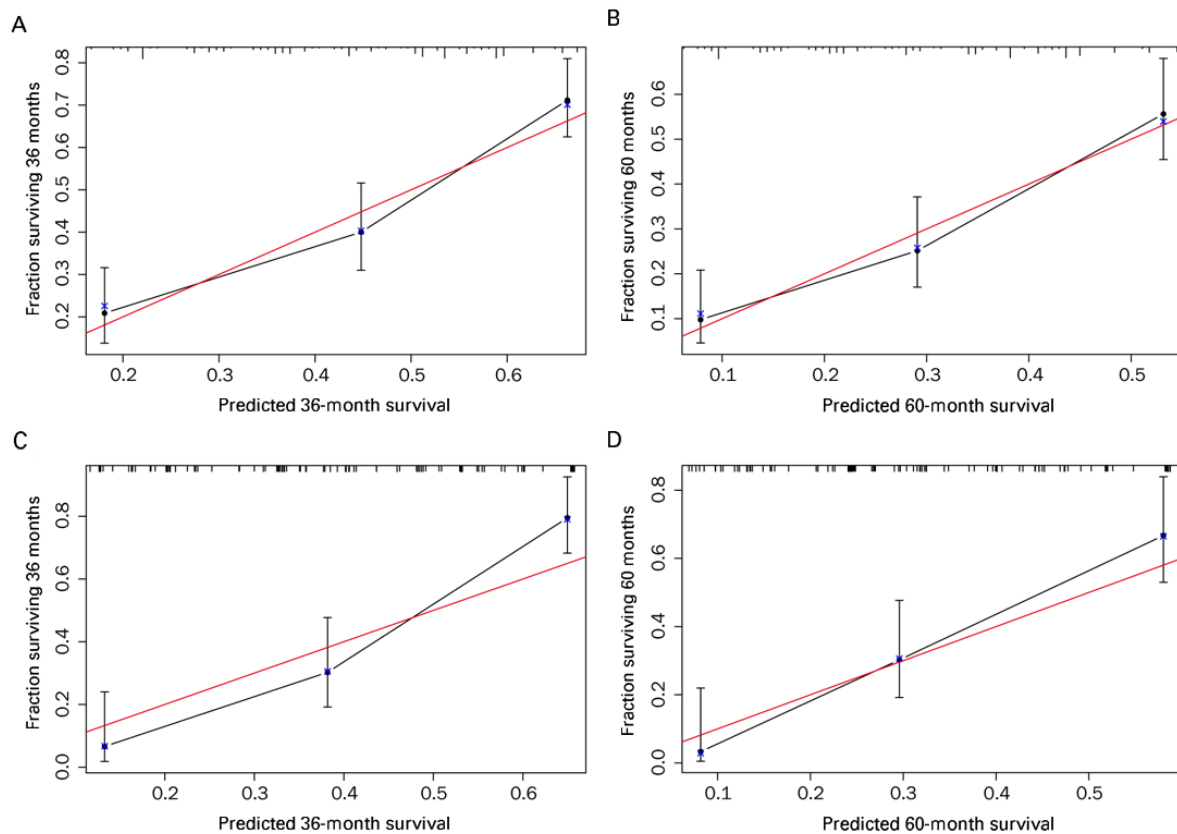

**S5 Fig.** Calibration curves of the nomogram for predicting 3- and 5-year survival. (A) 3-Year survival in the training cohort. (B) 5-Year survival in the training cohort. (C) 3-Year survival in the validation cohort. (D) 5-Year survival in the validation cohort. The red line indicates ideal predictive accuracy, and the black line represents the predictive performance of the nomogram.
